# Supplementary material for: Foot Temperature by Infrared Thermography in Patients with Peripheral Artery Disease before and after Structured Home-Based Exercise: A Gender-Based Observational Study
Source: MDPI journal article supplement (doi:10.3390/jpm13091312), 2023-08-27
Supplement: s1 [file s1]

**Supplementary Table S1.** Baseline characteristics of the two subgroups of subjects under study.

|                                | Men (n=51)  | Women (n=25) | p value |
|--------------------------------|-------------|--------------|---------|
| Age (years)                    | 73 ± 7      | 75 ± 7       | 0.43    |
|                                |             |              |         |
| Smoking, n (%)                 | 47 (92)     | 20 (80)      | 0.21    |
| Hypertension, n (%)            | 47 (92)     | 22 (88)      | 0.56    |
| Diabetes, n (%)                | 27 (52)     | 9 (36)       | 0.16    |
| Hyperlipidemia, n (%)          | 36 (70)     | 16 (74)      | 0.56    |
|                                |             |              |         |
| Charlson Comorbidity Index     | 6 ± 2       | 6 ± 2        | 0.75    |
| ABI, more impaired limb        | 0.58 ± 0.20 | 0.61 ± 0.17  | 0.44    |
| ABI, less impaired limb        | 0.86 ± 0.22 | 0.85 ± 0.20  | 0.69    |
| 6-minute walking distance (m)  | 309 ± 93    | 275 ± 70     | 0.12    |
| Pain-free walking distance (m) | 154 ± 88    | 127 ± 93     | 0.21    |

**Supplementary Table S2.** Values of Foot temperature over the ROIs in the more impaired limb in men versus women. \*  $p < 0.05$  with respect to baseline; ‡  $p < 0.05$  with respect to T1.

| <i>ROIs more impaired limb MEN</i>   | T0                    | T1                    | T2                     | T3                     | t for trend<br>P value |
|--------------------------------------|-----------------------|-----------------------|------------------------|------------------------|------------------------|
| Posterior tibial (°C)                | 28.2<br>27.7 to 28.7  | 28.7<br>28.1 to 29.3  | 28.7<br>28.0 to 29.3   | 29.4*<br>28.9 to 29.8  | 4.79<br><0.001         |
| Anterior tibial (°C)                 | 28.9<br>28.3 to 29.6  | 29.4<br>28.8 to 29.9  | 29.6*<br>29.0 to 30.2  | 29.8<br>29.2 to 30.3   | 3.45<br>0.011          |
| Dorsalis pedis (°C)                  | 27.7<br>27.1 to 28.2  | 28.4*<br>27.8 to 29.0 | 28.5*‡<br>27.9 to 29.0 | 28.9*‡<br>28.4 to 29.5 | 5.48<br><0.001         |
| Arcuate pedis (°C)                   | 28.1<br>27.6 to 28.6  | 29.0*<br>28.4 to 29.5 | 29.1*<br>28.5 to 29.7  | 29.4*<br>28.9 to 29.9  | 5.78<br><0.001         |
| Mean (°C)                            | 28.2<br>27.7 to 28.7  | 28.9*<br>28.4 to 29.4 | 29.0*<br>28.4 to 29.5  | 29.4*<br>28.9 to 29.9  | 6.96<br><0.001         |
| <i>ROIs less impaired limb WOMEN</i> | T0                    | T1                    | T2                     | T3                     | t for trend<br>P value |
| Posterior tibial (°C)                | 27,8<br>26,5 to 28,3  | 28,3*<br>27,4 to 29,2 | 29,0*<br>28,1 to 29,9  | 28,8<br>28,0 to 29,6   | 4.02<br><0.001         |
| Anterior tibial (°C)                 | 29,2<br>28,4 to 30,1  | 29,9<br>29,3 to 30,4  | 30,6*<br>29,7 to 31,6  | 30,6*<br>29,9 to 31,2  | 3.72<br>0.001          |
| Dorsalis pedis (°C)                  | 27,3<br>26,4 to 28,2  | 28,1<br>27,3 to 28,9  | 29,0*<br>28,2 to 29,9  | 28,6<br>27,6 to 29,6   | 3.81<br><0.001         |
| Arcuate pedis (°C)                   | 27,9<br>27,1 to 28,7  | 29,0*<br>28,3 to 29,7 | 29,6*<br>28,8 to 30,5  | 30,0*<br>29,0 to 30,9  | 5.10<br><0.001         |
| Mean (°C)                            | 28.0*<br>27,2 to 28,7 | 28,9*<br>28,2 to 29,5 | 29,6*<br>28,8 to 30,4  | 29.5*<br>28,8 to 30,2  | 5.75<br><0.001         |
